# Supplementary material
Source: PubMed Central journal article supplement (PMC3836260)
Supplement: NIHMS488287-supplement-table_1.pdf [file NIHMS488287-supplement-table_1.pdf]

Supplemental Table 1. Self-reported risk of motor vehicle accident (MVA) after cannabis intake

| Location /Country | N total | Cases                                                    | N cases | Controls                                                              | N controls | Cannabis Intake History or DUIC | CB exposure time prior to driving | CB Only? | Parameter | OR or RR          | 95% CI or p-value | Crude (C) or Adjusted (factors) | Ref. |
|-------------------|---------|----------------------------------------------------------|---------|-----------------------------------------------------------------------|------------|---------------------------------|-----------------------------------|----------|-----------|-------------------|-------------------|---------------------------------|------|
| Atlantic Canada   | 4055    | 10 <sup>th</sup> & 12 <sup>th</sup> grade students, DUIC | 877     | 10 <sup>th</sup> & 12 <sup>th</sup> grade students, no CB consumption | 3178       | DUIC                            | ≤1 h                              | --       | MVA       | 4.14 <sup>a</sup> | p<0.001           | C                               | (21) |
| Atlantic Canada   | 4055    | 10 <sup>th</sup> & 12 <sup>th</sup> grade students, DUIC | 877     | 10 <sup>th</sup> & 12 <sup>th</sup> grade students, no CB consumption | 3178       | DUIC                            | ≤1 h                              | --       | MVA       | 1.84 <sup>a</sup> | p<0.001           | Demographics, DUIA              | (21) |
| Ontario, Canada   | 699     | CB addiction treatment patients                          | 181     | Frequency-matched (age, sex) licensed drivers                         | 518        | Chronic/abuse History           | --                                | --       | MVA       | 1.49 <sup>b</sup> | 1.17-1.89         | Demographics, cocaine abuse     | (30) |
| Ontario, Canada   | 2676    | Adult drivers who consumed CB in lifetime                | 1097    | Adult drivers who never consumed CB                                   | 1579       | History                         | --                                | --       | MVA       | 1.47 <sup>a</sup> | 1.08-1.99         | Demographics                    | (27) |
| Ontario, Canada   | 2611    | Adult drivers w/ past year CB intake ≤1x/wk              | 254     | Adult drivers w/ no past-year CB intake                               | 2357       | History                         | --                                | --       | MVA       | 1.24 <sup>a</sup> | 0.80-1.93         | Demographics                    | (27) |
| Ontario, Canada   | 2422    | Adult drivers w/ past year CB intake >1x/wk              | 65      | Adult drivers w/ no past-year CB intake                               | 2357       | History                         | --                                | --       | MVA       | 2.76 <sup>a</sup> | 1.50-5.08         | Demographics                    | (27) |
| Ontario, Canada   | 2676    | Adults, drove within 1 h of CB intake in past year       | 70      | Adult drivers, did not drive within 1 h of CB intake in past year     | 2606       | DUIC                            | ≤1 h                              | --       | MVA       | 3.89 <sup>a</sup> | 2.30-6.59         | C                               | (27) |

| Location /Country    | N total         | Cases                                                  | N cases | Controls                                                          | N controls | Cannabis Intake History or DUIC | CB exposure time prior to driving | CB Only? | Parameter          | OR or RR          | 95% CI or p-value | Crude (C) or Adjusted (factors)                                                      | Ref. |
|----------------------|-----------------|--------------------------------------------------------|---------|-------------------------------------------------------------------|------------|---------------------------------|-----------------------------------|----------|--------------------|-------------------|-------------------|--------------------------------------------------------------------------------------|------|
| Ontario, Canada      | 2676            | Adults, drove within 1 h of CB intake in past year     | 70      | Adult drivers, did not drive within 1 h of CB intake in past year | 2606       | DUIC                            | ≤1 h                              | --       | MVA                | 2.61 <sup>a</sup> | 1.45-4.68         | Demographics                                                                         | (27) |
| Auckland New Zealand | 1139            | Drove within 3 h of CB intake                          | 37      | Did not drive within 3 h of CB intake                             | 1102       | DUIC                            | ≤3 h                              | --       | MVA-I <sup>c</sup> | 11.4 <sup>a</sup> | 3.6-35.4          | C                                                                                    | (28) |
| Auckland New Zealand | 1139            | Drove within 3 h of CB intake                          | 37      | Did not drive within 3 h of CB intake                             | 1102       | DUIC                            | ≤3 h                              | --       | MVA-I <sup>c</sup> | 0.8 <sup>a</sup>  | 0.2-3.3           | Demographics, time of day, no. passengers, risky behavior (BAC, speed, seatbelt use) | (28) |
| Spain                | 155             | Car drivers, consumed CB 1-4 days/wk                   | 11      | Car drivers, no CB consumption                                    | 144        | History                         | --                                | --       | MVA-NFI            | 1.2 <sup>a</sup>  | 0.5-2.8           | Demographics, distance driven, other drugs                                           | (31) |
| Spain                | 156             | Car drivers, consumed CB >4 days/wk                    | 12      | Car drivers, no CB consumption                                    | 144        | History                         | --                                | --       | MVA-NFI            | 2.5 <sup>a</sup>  | 1.2-5.1           | Demographics, distance driven, other drugs                                           | (31) |
| Spain                | 68 <sup>d</sup> | Regular cocaine users, driving within 1 h of CB intake | 68      | Same population, not driving within 1 h of CB intake              | 68         | DUIC                            | ≤1 h                              | --       | NFDI, past year    | 7.0 <sup>b</sup>  | 3.1-16            | --                                                                                   | (32) |
| Spain                | 68 <sup>d</sup> | Regular cocaine users, driving within 2 h of CB intake | 68      | Same population, not driving within 2 h of CB intake              | 68         | DUIC                            | ≤2 h                              | --       | NFDI, past year    | 2.2 <sup>b</sup>  | 1.0-4.9           | --                                                                                   | (32) |

| Location /Country | N total         | Cases                                                                   | N cases | Controls                                             | N controls | Cannabis Intake History or DUIC | CB exposure time prior to driving | CB Only?         | Parameter       | OR or RR          | 95% CI or p-value | Crude (C) or Adjusted (factors) | Ref. |
|-------------------|-----------------|-------------------------------------------------------------------------|---------|------------------------------------------------------|------------|---------------------------------|-----------------------------------|------------------|-----------------|-------------------|-------------------|---------------------------------|------|
| Spain             | 45 <sup>d</sup> | Regular cocaine users, driving within 1 h of CB intake                  | 45      | Same population, not driving within 1 h of CB intake | 45         | DUIC                            | ≤1 h                              | CB only          | NFDI, past year | 5.8 <sup>b</sup>  | 2.4-14            | --                              | (32) |
| Spain             | 45 <sup>d</sup> | Regular cocaine users, driving within 2 h of CB intake                  | 45      | Same population, not driving within 2 h of CB intake | 45         | DUIC                            | ≤2 h                              | CB only          | NFDI, past year | 2.2 <sup>b</sup>  | 0.9-5.2           | --                              | (32) |
| Spain             | 19 <sup>d</sup> | Regular cocaine users, driving within 1 h of CB intake & 2 h of alcohol | 19      | Same population, not DUID                            | 19         | DUIC                            | ≤1 h                              | +Alc in past 2 h | NFDI, past year | 10.9 <sup>b</sup> | 1.3-88            | --                              | (32) |

<sup>a</sup>OR (odds ratio)

<sup>b</sup>RR (relative risk)

<sup>c</sup>Cars in MVA with ≥1 occupant hospitalized or killed

<sup>d</sup>Case-crossover design

Abbreviations: DUIA: driving under the influence of alcohol; CB: cannabis; CI: confidence interval; Ref.: reference; NFI: non-fatal injury; NFDI: non-fatal driver injury; BAC: blood alcohol content
