# Supplementary material
Source: PubMed Central journal article supplement (PMC3836260)
Supplement: NIHMS488287-supplement-table_2.pdf [file NIHMS488287-supplement-table_2.pdf]

Supplemental Table 2. Risk of driver culpability or responsibility in motor vehicle accidents (MVA) after cannabis exposure

| Location/<br>Country                   | N<br>(total) | Cases                                             | N<br>(cases) | Controls                                                   | N<br>(controls) | Analytical<br>Matrix                        | THC<br>Cutoff<br>(ng/mL) | CB<br>Only | Parameter | OR<br>or<br>RR    | 95% CI        | Crude (C) or<br>Adjusted<br>(factors)                                 | Ref. |
|----------------------------------------|--------------|---------------------------------------------------|--------------|------------------------------------------------------------|-----------------|---------------------------------------------|--------------------------|------------|-----------|-------------------|---------------|-----------------------------------------------------------------------|------|
| Victoria,<br>NSW &<br>WA,<br>Australia | 1762         | Fatally injured<br>drivers, THC<br>+              | 58           | Fatally<br>injured<br>drivers,<br>THC -                    | 1704            | Blood                                       | Not<br>given             | CB<br>only | MVA-DC    | 2.7 <sup>a</sup>  | 1.02-7.0      | Demographics,<br>crash type,<br>BAC, year,<br>year x crash<br>type    | (15) |
| Victoria,<br>NSW &<br>WA,<br>Australia | 1753         | Fatally injured<br>drivers, THC<br>≥5 ng/mL       | 49           | Fatally<br>injured<br>drivers,<br>THC -                    | 1704            | Blood                                       | 5                        | CB<br>only | MVA-DC    | 6.6 <sup>a</sup>  | 1.5-28        | Demographics,<br>crash type,<br>BAC, year,<br>year x crash<br>type    | (15) |
| Ontario,<br>Canada                     | 699          | Cannabis<br>addiction<br>treatment<br>patients    | 181          | Frequency-<br>matched<br>(age, sex)<br>licensed<br>drivers | 518             | N/A:<br>Collision/<br>conviction<br>records | --                       | --         | MVA-DC    | 1.68 <sup>b</sup> | 1.21-<br>2.34 | Demographics,<br>cocaine abuse                                        | (30) |
| France                                 | 9772         | Drivers in<br>fatal crashes,<br>THC +             | 759          | Drivers in<br>fatal crashes,<br>THC -                      | 9013            | Blood                                       | Not<br>given             | --         | MVA-DC    | 3.17 <sup>a</sup> | 2.56-<br>3.94 | C                                                                     | (37) |
| France                                 | 9091         | Drivers in<br>fatal crashes,<br>THC +             | 759          | Drivers in<br>fatal crashes,<br>THC -                      | 9013            | Blood                                       | Not<br>given             | --         | MVA-DC    | 1.78 <sup>a</sup> | 1.40-<br>2.25 | Demographics,<br>BAC, Blood<br>THC<br>concentration,<br>time of crash | (37) |
| France                                 | 9091         | Drivers in<br>fatal crashes,<br>THC + <1<br>ng/mL | 78           | Drivers in<br>fatal crashes,<br>THC -                      | 9013            | Blood                                       | Not<br>given             | --         | MVA-DC    | 2.18 <sup>a</sup> | 1.22-<br>3.89 | C                                                                     | (37) |

| Location/<br>Country | N<br>(total) | Cases                                     | N<br>(cases) | Controls                        | N<br>(controls) | Analytical<br>Matrix | THC<br>Cutoff<br>(ng/mL) | CB<br>Only | Parameter | OR<br>or<br>RR    | 95% CI    | Crude (C) or<br>Adjusted<br>(factors)                     | Ref. |
|----------------------|--------------|-------------------------------------------|--------------|---------------------------------|-----------------|----------------------|--------------------------|------------|-----------|-------------------|-----------|-----------------------------------------------------------|------|
| France               | 9091         | Drivers in fatal crashes, THC + <1 ng/mL  | 78           | Drivers in fatal crashes, THC - | 9013            | Blood                | Not given                | --         | MVA-DC    | 1.57 <sup>a</sup> | 0.84-2.95 | Demographics, BAC, Blood THC concentration, time of crash | (37) |
| France               | 9311         | Drivers in fatal crashes, THC + 1-2 ng/mL | 298          | Drivers in fatal crashes, THC - | 9013            | Blood                | 1                        | --         | MVA-DC    | 2.54 <sup>a</sup> | 1.86-3.48 | C                                                         | (37) |
| France               | 9311         | Drivers in fatal crashes, THC + 1-2 ng/mL | 298          | Drivers in fatal crashes, THC - | 9013            | Blood                | 1                        | --         | MVA-DC    | 1.54 <sup>a</sup> | 1.09-2.18 | Demographics, BAC, Blood THC concentration, time of crash | (37) |
| France               | 9156         | Drivers in fatal crashes, THC + 3-4 ng/mL | 143          | Drivers in fatal crashes, THC - | 9013            | Blood                | 3                        | --         | MVA-DC    | 3.78 <sup>a</sup> | 2.24-6.37 | C                                                         | (37) |
| France               | 9156         | Drivers in fatal crashes, THC + 3-4 ng/mL | 143          | Drivers in fatal crashes, THC - | 9013            | Blood                | 3                        | --         | MVA-DC    | 2.13 <sup>a</sup> | 1.22-3.73 | Demographics, BAC, Blood THC concentration, time of crash | (37) |
| France               | 9253         | Drivers in fatal crashes, THC + ≥5 ng/mL  | 240          | Drivers in fatal crashes, THC - | 9013            | Blood                | 5                        | --         | MVA-DC    | 4.72 <sup>a</sup> | 3.04-7.33 | C                                                         | (37) |
| France               | 9253         | Drivers in fatal crashes, THC + ≥5 ng/mL  | 240          | Drivers in fatal crashes, THC - | 9013            | Blood                | 5                        | --         | MVA-DC    | 2.12 <sup>a</sup> | 1.32-3.38 | Demographics, BAC, Blood THC concentration, time of crash | (37) |

| Location/<br>Country | N<br>(total) | Cases                                 | N<br>(cases) | Controls                              | N<br>(controls) | Analytical<br>Matrix | THC<br>Cutoff<br>(ng/mL) | CB<br>Only | Parameter | OR<br>or<br>RR    | 95% CI        | Crude (C) or<br>Adjusted<br>(factors) | Ref. |
|----------------------|--------------|---------------------------------------|--------------|---------------------------------------|-----------------|----------------------|--------------------------|------------|-----------|-------------------|---------------|---------------------------------------|------|
| United<br>States     | 32543        | Drivers in<br>fatal crashes,<br>THC + | 1647         | Drivers in<br>fatal crashes,<br>THC - | 30896           | Blood or<br>Urine    | Not<br>given             | 0%<br>BAC  | MVA-DRF   | 1.39 <sup>a</sup> | 1.21-<br>1.59 | C                                     | (22) |
| United<br>States     | 32543        | Drivers in<br>fatal crashes,<br>THC + | 1647         | Drivers in<br>fatal crashes,<br>THC - | 30896           | Blood or<br>Urine    | Not<br>given             | 0%<br>BAC  | MVA-DRF   | 1.29 <sup>a</sup> | 1.11-<br>1.50 | Demographics,<br>driving record       | (22) |

<sup>a</sup> Odds ratio (OR)

<sup>b</sup>Relative risk (RR)

Abbreviations: THC:  $\Delta^9$ -tetrahydrocannabinol; CB: cannabis; CI: confidence interval; Ref.: reference; NSW: New South Wales; WA: Western Australia; DC: driver was judged culpable; DRF:  $\geq 1$  driver related factor (potentially unsafe driving action) contributed to crash; BAC: blood alcohol content
