# Supplementary material
Source: PubMed Central journal article supplement (PMC3836260)
Supplement: NIHMS488287-supplement-table_3.pdf [file NIHMS488287-supplement-table_3.pdf]

Supplemental Table 3. Effect of smoked cannabis on neurocognitive function: laboratory studies

| Task                                                     | THC Dose                                                   | N  | Age (years)<br>Mean±SD,<br>[Range] | Cannabis<br>History                                | Measure                                               | Time (h)<br>After THC<br>Dosing | Outcome                                                                  | Relative to | Ref. |
|----------------------------------------------------------|------------------------------------------------------------|----|------------------------------------|----------------------------------------------------|-------------------------------------------------------|---------------------------------|--------------------------------------------------------------------------|-------------|------|
| <i>Memory</i>                                            |                                                            |    |                                    |                                                    |                                                       |                                 |                                                                          |             |      |
| Free recall                                              | Two 3.6%<br>THC joints;<br>4 puffs/joint<br>spaced by 2 h  | 14 | 24.5, [21-34]                      | ≥1x/Month;<br>10/14: >100<br>lifetime<br>occasions | # Words<br>recalled                                   | ~1.25-1.5 <sup>b</sup>          | ns                                                                       | Placebo     | (56) |
| <i>Distance/Time Perception</i>                          |                                                            |    |                                    |                                                    |                                                       |                                 |                                                                          |             |      |
| Estimated<br>time &<br>distance to<br>approaching<br>car | 13, 17 mg                                                  | 14 | 27±7.45                            | ≥1 Joint/day<br>for ≥5 years                       | Distance<br>estimation                                | ~1.25 <sup>a</sup>              | ns                                                                       | Placebo     | (62) |
| Estimated<br>time &<br>distance to<br>approaching<br>car | 13, 17 mg                                                  | 14 | 27±7.45                            | ≥1 Joint/day<br>for ≥5 years                       | Time<br>estimation                                    | ~1.25 <sup>a</sup>              | ns                                                                       | Placebo     | (62) |
| Time<br>production                                       | Two 3.6%<br>THC joints (4<br>puffs/joint)<br>spaced by 2 h | 14 | 24.5, [21-34]                      | ≥1x/Month;<br>10/14: >100<br>lifetime<br>occasions | Respond<br>when believe<br>30, 60, 120<br>sec elapsed | ~1.25 <sup>b</sup>              | Underproduction<br>(estimated time<br>intervals shorter<br>than targets) | Placebo     | (56) |
| <i>Logical/Mathematical Reasoning Skills</i>             |                                                            |    |                                    |                                                    |                                                       |                                 |                                                                          |             |      |
| WCS                                                      | 13 mg                                                      | 14 | 27±7.45                            | ≥1 Joint/day<br>for ≥5 years                       | # Blocks<br>completed<br>without error                | ~0.75 <sup>a</sup>              | -1.2<br>(16.6 vs. 17.8)                                                  | Placebo     | (62) |
| WCS                                                      | 17 mg                                                      | 14 | 27±7.45                            | ≥1 Joint/day<br>for ≥5 years                       | # Blocks<br>completed<br>without error                | ~0.75 <sup>a</sup>              | -1.6<br>(16.2 vs. 17.8)                                                  | Placebo     | (62) |
| WCS                                                      | 13 mg                                                      | 14 | 27±7.45                            | ≥1 Joint/day<br>for ≥5 years                       | # Non-<br>perseverance<br>errors                      | ~0.75 <sup>a</sup>              | +1.1<br>(4.3 vs. 3.2)                                                    | Placebo     | (62) |

| Task                   | THC Dose                                                  | N  | Age (years)<br>Mean±SD,<br>[Range] | Cannabis<br>History                                | Measure                                             | Time (h)<br>After THC<br>Dosing | Outcome                   | Relative to         | Ref. |
|------------------------|-----------------------------------------------------------|----|------------------------------------|----------------------------------------------------|-----------------------------------------------------|---------------------------------|---------------------------|---------------------|------|
| WCS                    | 17 mg                                                     | 14 | 27±7.45                            | ≥1 Joint/day<br>for ≥5 years                       | # Non-<br>perseverance<br>errors                    | ~0.75 <sup>a</sup>              | +2.1<br>(5.3 vs. 3.2)     | Placebo             | (62) |
| WCS                    | 13 mg                                                     | 14 | 27±7.45                            | ≥1 Joint/day<br>for ≥5 years                       | # Total<br>errors                                   | ~0.75 <sup>a</sup>              | +1.2<br>(5.0 vs. 3.8)     | Placebo             | (62) |
| WCS                    | 17 mg                                                     | 14 | 27±7.45                            | ≥1 Joint/day<br>for ≥5 years                       | # Total<br>errors                                   | ~0.75 <sup>a</sup>              | +1.9<br>(5.7 vs. 3.8)     | Placebo             | (62) |
| DSST                   | Two 3.6%<br>THC joints;<br>4 puffs/joint<br>spaced by 2 h | 14 | 24.5, [21-34]                      | ≥1x/Month;<br>10/14: >100<br>lifetime<br>occasions | Percentage<br>correct                               | ~1.25-1.5 <sup>b</sup>          | -4.8%<br>(91.3 vs. 96.1%) | Before<br>drug dose | (56) |
| Backward<br>digit span | Two 3.6%<br>THC joints;<br>4 puffs/joint<br>spaced by 2 h | 14 | 24.5, [21-34]                      | ≥1x/Month;<br>10/14: >100<br>lifetime<br>occasions | --                                                  | ~1.25-1.5 <sup>b</sup>          | ns                        | Before<br>drug dose | (56) |
| Logical<br>reasoning   | Two 3.6%<br>THC joints;<br>4 puffs/joint<br>spaced by 2 h | 14 | 24.5, [21-34]                      | ≥1x/Month;<br>10/14: >100<br>lifetime<br>occasions | True/False<br>statements<br>about letter<br>pairs   | ~1.25-1.5 <sup>b</sup>          | ns                        | Before<br>drug dose | (56) |
| <i>Decision-Making</i> |                                                           |    |                                    |                                                    |                                                     |                                 |                           |                     |      |
| Gambling               | 13, 17 mg                                                 | 14 | 27±7.45                            | ≥1 Joint/day<br>for ≥5 years                       | Decision<br>making<br>speed                         | ~1.0 <sup>a</sup>               | ns                        | Placebo             | (62) |
| Gambling               | 13 mg                                                     | 14 | 27±7.45                            | ≥1 Joint/day<br>for ≥5 years                       | Percentage<br>choices of<br>less likely<br>outcomes | ~1.0 <sup>a</sup>               | ns                        | Placebo             | (62) |
| Gambling               | 17 mg                                                     | 14 | 27±7.45                            | ≥1 Joint/day<br>for ≥5 years                       | Percentage<br>choices of<br>less likely<br>outcomes | ~1.0 <sup>a</sup>               | significantly<br>higher   | Placebo             | (62) |
| Tower of<br>London     | 250 µg/kg<br>(~17.5 mg)                                   | 20 | 19-29                              | ≥5x in past<br>year                                | # Correct<br>decisions                              | 0.75                            | -2.1±1.1                  | Placebo             | (41) |

| Task            | THC Dose                | N  | Age (years)<br>Mean±SD,<br>[Range] | Cannabis<br>History                                                                      | Measure             | Time (h)<br>After THC<br>Dosing | Outcome   | Relative to | Ref. |
|-----------------|-------------------------|----|------------------------------------|------------------------------------------------------------------------------------------|---------------------|---------------------------------|-----------|-------------|------|
| Tower of London | 250 µg/kg<br>(~17.5 mg) | 20 | 19-29                              | ≥5x in past year                                                                         | # Correct decisions | 1.75                            | -2.2±1.1  | Placebo     | (41) |
| Tower of London | 250 µg/kg<br>(~17.5 mg) | 20 | 19-29                              | ≥5x in past year                                                                         | # Correct decisions | 5.75                            | +0.3±0.8  | Placebo     | (41) |
| Tower of London | 500 µg/kg<br>(~35 mg)   | 20 | 19-29                              | ≥5x in past year                                                                         | # Correct decisions | 0.75                            | -2.6±0.59 | Placebo     | (41) |
| Tower of London | 500 µg/kg<br>(~35 mg)   | 20 | 19-29                              | ≥5x in past year                                                                         | # Correct decisions | 1.75                            | -3.2±1.0  | Placebo     | (41) |
| Tower of London | 500 µg/kg<br>(~35 mg)   | 20 | 19-29                              | ≥5x in past year                                                                         | # Correct decisions | 5.75                            | -1.0±0.9  | Placebo     | (41) |
| Tower of London | 500 µg/kg<br>(~35 mg)   | 12 | 22.8±2.3                           | ≤1Day/week,<br>55±36<br>occasions/year,<br>1.2±0.5<br>joints/occasion                    | # Correct decisions | 1.0                             | ns        | Placebo     | (5)  |
| Tower of London | 500 µg/kg<br>(~35 mg)   | 12 | 22.8±2.3                           | ≤1Day/week,<br>55±36<br>occasions/year,<br>1.2±0.5<br>joints/occasion                    | RT                  | 1.0                             | ns        | Placebo     | (5)  |
| Tower of London | 500 µg/kg<br>(~35 mg)   | 12 | 23.2±3.3                           | >4 Days/week<br>in past year,<br>340±86<br>occasions/year,<br>2.3±1.2<br>joints/occasion | # Correct decisions | 1.0                             | ns        | Placebo     | (5)  |
| Tower of London | 500 µg/kg<br>(~35 mg)   | 12 | 23.2±3.3                           | >4 Days/week<br>in past year,<br>340±86<br>occasions/year,<br>2.3±1.2<br>joints/occasion | RT                  | 1.0                             | ns        | Placebo     | (5)  |

| Task              | THC Dose                | N  | Age (years)<br>Mean±SD,<br>[Range] | Cannabis<br>History                                                            | Measure                          | Time (h)<br>After THC<br>Dosing | Outcome               | Relative to     | Ref. |
|-------------------|-------------------------|----|------------------------------------|--------------------------------------------------------------------------------|----------------------------------|---------------------------------|-----------------------|-----------------|------|
| Tower of London   | 400 µg/kg<br>(~28 mg)   | 21 | 23.2±8.4 [19-38]                   | >4 Days/week in past year, 373.7±101.6 occasions/year, 5.0±3.9 joints/occasion | # Correct decisions              | 1.17-3.17                       | ns                    | Before THC dose | (63) |
| Tower of London   | 400 µg/kg<br>(~28 mg)   | 21 | 23.2±8.4 [19-38]                   | >4 Days/week in past year, 373.7±101.6 occasions/year, 5.0±3.9 joints/occasion | RT                               | 1.17-3.17                       | ns                    | Before THC dose | (63) |
| <i>Integrated</i> |                         |    |                                    |                                                                                |                                  |                                 |                       |                 |      |
| Virtual Maze      | 13, 17 mg               | 14 | 27±7.45                            | ≥1 Joint/day for ≥5 years                                                      | Completion time                  | Immediately after vitals        | ns                    | Placebo         | (62) |
| Virtual Maze      | 13 mg                   | 14 | 27±7.45                            | ≥1 Joint/day for ≥5 years                                                      | Mean # wall collisions per trial | Immediately after vitals        | ns                    | Placebo         | (62) |
| Virtual Maze      | 17 mg                   | 14 | 27±7.45                            | ≥1 Joint/day for ≥5 years                                                      | Mean # wall collisions per trial | Immediately after vitals        | +2.6<br>(5.5 vs. 2.9) | Placebo         | (62) |
| Virtual Maze      | 17 mg                   | 14 | 27±7.45                            | ≥1 Joint/day for ≥5 years                                                      | Mean # wall collisions per trial | Immediately after vitals        | +2.3<br>(5.5 vs. 3.2) | 13 mg THC       | (62) |
| CTT               | 250 µg/kg<br>(~17.5 mg) | 20 | 19-29                              | ≥5x in past year                                                               | $\lambda c^c$                    | 0.25                            | -0.21±0.13 rad/sec    | Placebo         | (41) |
| CTT               | 250 µg/kg<br>(~17.5 mg) | 20 | 19-29                              | ≥5x in past year                                                               | $\lambda c$                      | 1.25                            | -0.40±0.16 rad/sec    | Placebo         | (41) |
| CTT               | 250 µg/kg<br>(~17.5 mg) | 20 | 19-29                              | ≥5x in past year                                                               | $\lambda c$                      | 3.25                            | -0.18±0.13 rad/sec    | Placebo         | (41) |
| CTT               | 250 µg/kg<br>(~17.5 mg) | 20 | 19-29                              | ≥5x in past year                                                               | $\lambda c$                      | 5.25                            | -0.17±0.13 rad/sec    | Placebo         | (41) |

| Task | THC Dose              | N  | Age (years)<br>Mean±SD,<br>[Range] | Cannabis<br>History                                                   | Measure | Time (h)<br>After THC<br>Dosing | Outcome               | Relative to | Ref. |
|------|-----------------------|----|------------------------------------|-----------------------------------------------------------------------|---------|---------------------------------|-----------------------|-------------|------|
| CTT  | 500 µg/kg<br>(~35 mg) | 20 | 19-29                              | ≥5x in past<br>year                                                   | λc      | 0.25                            | -0.60±0.21<br>rad/sec | Placebo     | (41) |
| CTT  | 500 µg/kg<br>(~35 mg) | 20 | 19-29                              | ≥5x in past<br>year                                                   | λc      | 1.25                            | -0.55±0.17<br>rad/sec | Placebo     | (41) |
| CTT  | 500 µg/kg<br>(~35 mg) | 20 | 19-29                              | ≥5x in past<br>year                                                   | λc      | 3.25                            | -0.27±0.13<br>rad/sec | Placebo     | (41) |
| CTT  | 500 µg/kg<br>(~35 mg) | 20 | 19-29                              | ≥5x in past<br>year                                                   | λc      | 5.25                            | -0.48±0.08<br>rad/sec | Placebo     | (41) |
| CTT  | 500 µg/kg<br>(~35 mg) | 12 | 22.8±2.3                           | ≤1Day/week,<br>55±36<br>occasions/year,<br>1.2±0.5<br>joints/occasion | λc      | 0.17                            | ~ -0.7 rad/sec        | Placebo     | (5)  |
| CTT  | 500 µg/kg<br>(~35 mg) | 11 | 22.8±2.3                           | ≤1Day/week,<br>55±36<br>occasions/year,<br>1.2±0.5<br>joints/occasion | λc      | 3.08                            | ~ -0.6 rad/sec        | Placebo     | (5)  |
| CTT  | 500 µg/kg<br>(~35 mg) | 11 | 22.8±2.3                           | ≤1Day/week,<br>55±36<br>occasions/year,<br>1.2±0.5<br>joints/occasion | λc      | 5.08                            | ~ -0.2 rad/sec        | Placebo     | (5)  |
| CTT  | 500 µg/kg<br>(~35 mg) | 11 | 22.8±2.3                           | ≤1Day/week,<br>55±36<br>occasions/year,<br>1.2±0.5<br>joints/occasion | λc      | 7.08                            | ~ -0.4 rad/sec        | Placebo     | (5)  |

| Task | THC Dose                                                       | N  | Age (years)<br>Mean±SD,<br>[Range] | Cannabis<br>History                                                                           | Measure                                       | Time (h)<br>After THC<br>Dosing | Outcome               | Relative to         | Ref. |
|------|----------------------------------------------------------------|----|------------------------------------|-----------------------------------------------------------------------------------------------|-----------------------------------------------|---------------------------------|-----------------------|---------------------|------|
| CTT  | 500 µg/kg<br>(~35 mg)                                          | 12 | 23.2±3.3                           | >4 Days/week<br>in past year,<br>340±86<br>occasions/year,<br>2.3±1.2<br>joints/occasion      | --                                            | 0.17-7.08                       | ns                    | Placebo             | (5)  |
| CTT  | 400 µg/kg<br>(~28 mg)                                          | 21 | 23.2±8.4<br>[19-38]                | >4 Days/week<br>in past year,<br>373.7±101.6<br>occasions/year,<br>5.0±3.9<br>joints/occasion | λc                                            | 0.3-3.3                         | ns                    | Before<br>THC dose  | (63) |
| DAT  | 2 0% or 3.6%<br>THC joints (4<br>puffs/joint)<br>spaced by 2 h | 14 | 24.5, [21-34]                      | ≥1x/Month;<br>10/14: >100<br>lifetime<br>occasions                                            | Response to<br>primary<br>target: hit<br>rate | ~1.25-1.5 <sup>b</sup>          | ns                    | Before<br>drug dose | (56) |
| DAT  | 2 0% or 3.6%<br>THC joints (4<br>puffs/joint)<br>spaced by 2 h | 14 | 24.5, [21-34]                      | ≥1x/Month;<br>10/14: >100<br>lifetime<br>occasions                                            | Response to<br>primary<br>target: RT          | ~1.25-1.5 <sup>b</sup>          | ns                    | Before<br>drug dose | (56) |
| DAT  | 2 0% or 3.6%<br>THC joints (4<br>puffs/joint)<br>spaced by 2 h | 14 | 24.5, [21-34]                      | ≥1x/Month;<br>10/14: >100<br>lifetime<br>occasions                                            | # False<br>alarm<br>responses                 | ~1.25-1.5 <sup>b</sup>          | +0.7<br>(1.6 vs. 0.9) | Before<br>drug dose | (56) |
| DAT  | 500 µg/kg<br>(~35 mg)                                          | 12 | 22.8±2.3                           | ≤1Day/week,<br>55±36<br>occasions/year,<br>1.2±0.5<br>joints/occasion                         | Tracking<br>error                             | 0.33                            | ~ +5.0 mm             | Placebo             | (5)  |

| Task | THC Dose              | N  | Age (years)<br>Mean±SD,<br>[Range] | Cannabis<br>History                                                                      | Measure                                         | Time (h)<br>After THC<br>Dosing | Outcome | Relative to | Ref. |
|------|-----------------------|----|------------------------------------|------------------------------------------------------------------------------------------|-------------------------------------------------|---------------------------------|---------|-------------|------|
| DAT  | 500 µg/kg<br>(~35 mg) | 12 | 22.8±2.3                           | ≤1Day/week,<br>55±36<br>occasions/year,<br>1.2±0.5<br>joints/occasion                    | % Correct<br>detections on<br>secondary<br>task | 0.33                            | ~ -10%  | Placebo     | (5)  |
| DAT  | 500 µg/kg<br>(~35 mg) | 12 | 22.8±2.3                           | ≤1Day/week<br>55±36<br>occasions/year,<br>1.2±0.5<br>joints/occasion                     | # Control<br>losses                             | 0.33                            | ~ +39   | Placebo     | (5)  |
| DAT  | 500 µg/kg<br>(~35 mg) | 12 | 23.2±3.3                           | >4 Days/week<br>in past year,<br>340±86<br>occasions/year,<br>2.3±1.2<br>joints/occasion | Tracking<br>error                               | 0.33                            | ns      | Placebo     | (5)  |
| DAT  | 500 µg/kg<br>(~35 mg) | 12 | 23.2±3.3                           | >4 Days/week<br>in past year,<br>340±86<br>occasions/year,<br>2.3±1.2<br>joints/occasion | % Correct<br>detections on<br>secondary<br>task | 0.33                            | ns      | Placebo     | (5)  |
| DAT  | 500 µg/kg<br>(~35 mg) | 12 | 23.2±3.3                           | >4 Days/week<br>in past year,<br>340±86<br>occasions/year,<br>2.3±1.2<br>joints/occasion | # Control<br>losses                             | 0.33                            | ns      | Placebo     | (5)  |

| Task                                   | THC Dose                | N  | Age (years)<br>Mean±SD,<br>[Range] | Cannabis<br>History                                                                           | Measure                                         | Time (h)<br>After THC<br>Dosing | Outcome         | Relative to        | Ref. |
|----------------------------------------|-------------------------|----|------------------------------------|-----------------------------------------------------------------------------------------------|-------------------------------------------------|---------------------------------|-----------------|--------------------|------|
| DAT                                    | 400 µg/kg<br>(~28 mg)   | 21 | 23.2±8.4 [19-38]                   | >4 Days/week<br>in past year,<br>373.7±101.6<br>occasions/year,<br>5.0±3.9<br>joints/occasion | # Control<br>losses                             | 0.5-2.5                         | Increased       | Before<br>THC dose | (63) |
| DAT                                    | 400 µg/kg<br>(~28 mg)   | 21 | 23.2±8.4<br>[19-38]                | >4 Days/week<br>in past year,<br>373.7±101.6<br>occasions/year,<br>5.0±3.9<br>joints/occasion | # Correct<br>detections on<br>secondary<br>task | 0.5-2.5                         | Decreased       | Before<br>THC dose | (63) |
| DAT                                    | 400 µg/kg<br>(~28 mg)   | 21 | 23.2±8.4<br>[19-38]                | >4 Days/week<br>in past year,<br>373.7±101.6<br>occasions/year,<br>5.0±3.9<br>joints/occasion | RT                                              | 0.5-2.5                         | Increased       | Before<br>THC dose | (63) |
| <i>Reaction Time/Motor Impulsivity</i> |                         |    |                                    |                                                                                               |                                                 |                                 |                 |                    |      |
| SST                                    | 250 µg/kg<br>(~17.5 mg) | 11 | 19-29                              | ≥5x in past<br>year                                                                           | Stop RT                                         | 0.5                             | +17.5±17.2 msec | Placebo            | (41) |
| SST                                    | 250 µg/kg<br>(~17.5 mg) | 11 | 19-29                              | ≥5x in past<br>year                                                                           | Stop RT                                         | 1.5                             | +10.9±22.9 msec | Placebo            | (41) |
| SST                                    | 250 µg/kg<br>(~17.5 mg) | 11 | 19-29                              | ≥5x in past<br>year                                                                           | Stop RT                                         | 3.5                             | -3.3±20.1 msec  | Placebo            | (41) |
| SST                                    | 250 µg/kg<br>(~17.5 mg) | 11 | 19-29                              | ≥5x in past<br>year                                                                           | Stop RT                                         | 5.5                             | +4.8±11.4 msec  | Placebo            | (41) |
| SST                                    | 500 µg/kg<br>(~35 mg)   | 11 | 19-29                              | ≥5x in past<br>year                                                                           | Stop RT                                         | 0.5                             | +60.6±21.6 msec | Placebo            | (41) |
| SST                                    | 500 µg/kg<br>(~35 mg)   | 11 | 19-29                              | ≥5x in past<br>year                                                                           | Stop RT                                         | 1.5                             | +64.6±25.0 msec | Placebo            | (41) |
| SST                                    | 500 µg/kg<br>(~35 mg)   | 11 | 19-29                              | ≥5x in past<br>year                                                                           | Stop RT                                         | 3.5                             | +12.9±12.0 msec | Placebo            | (41) |



| Task | THC Dose              | N  | Age (years)<br>Mean±SD,<br>[Range] | Cannabis<br>History                                                                           | Measure              | Time (h)<br>After THC<br>Dosing | Outcome        | Relative to        | Ref. |
|------|-----------------------|----|------------------------------------|-----------------------------------------------------------------------------------------------|----------------------|---------------------------------|----------------|--------------------|------|
| SST  | 500 µg/kg<br>(~35 mg) | 11 | 19-29                              | ≥5x in past<br>year                                                                           | Stop RT              | 5.5                             | +7.0±17.9 msec | Placebo            | (41) |
| SST  | 500 µg/kg<br>(~35 mg) | 12 | 22.8±2.3                           | ≤1Day/week,<br>55±36<br>occasions/year,<br>1.2±0.5<br>joints/occasion                         | Stop RT              | 0.58                            | ~ +25 msec     | Placebo            | (5)  |
| SST  | 500 µg/kg<br>(~35 mg) | 12 | 23.2±3.3                           | >4 Days/week<br>in past year,<br>340±86<br>occasions/year,<br>2.3±1.2<br>joints/occasion      | Stop RT              | 0.58                            | ~ +110 msec    | Placebo            | (5)  |
| SST  | 400 µg/kg<br>(~28 mg) | 21 | 23.2±8.4<br>[19-38]                | >4 Days/week<br>in past year,<br>373.7±101.6<br>occasions/year,<br>5.0±3.9<br>joints/occasion | Stop RT              | 1-3                             | ns             | Before<br>THC dose | (63) |
| SST  | 400 µg/kg<br>(~28 mg) | 21 | 23.2±8.4<br>[19-38]                | >4 Days/week<br>in past year,<br>373.7±101.6<br>occasions/year,<br>5.0±3.9<br>joints/occasion | Commission<br>errors | 1-3                             | ns             | Before<br>THC dose | (63) |

<sup>a</sup>Denotes times after smoking initiated

<sup>b</sup>Denotes times after smoking completed

<sup>c</sup>λc: Critical frequency (tracking frequency at which control loss occurs)

Abbreviations: THC: Δ<sup>9</sup>-tetrahydrocannabinol; SD: standard deviation; ns: not significant; WCS: Wisconsin Card Sorting; DSST: Digit Symbol Substitution Test; RT: reaction time; CTT: critical tracking task; DAT: divided attention task; SST: stop signal task
