# Supplementary material
Source: PubMed Central journal article supplement (PMC3836260)
Supplement: NIHMS488287-supplement-table_4.pdf [file NIHMS488287-supplement-table_4.pdf]

Supplemental Table 4. Cannabis and alcohol effects on simulated and on-road driving

| Measure          | Measured by          | THC Dose                                       | Dose EtOH (g/kg or target BAC) | N            | Age (years) Mean±SD, [Range] | Cannabis History      | Time (min) after THC dose | Drive Length/ Time   | Outcome: THC only                         | Outcome: EtOH only | Outcome: Combination                 | Ref. |
|------------------|----------------------|------------------------------------------------|--------------------------------|--------------|------------------------------|-----------------------|---------------------------|----------------------|-------------------------------------------|--------------------|--------------------------------------|------|
| <i>Simulator</i> |                      |                                                |                                |              |                              |                       |                           |                      |                                           |                    |                                      |      |
| RT               | Brake latency        | 0, 8, 12, 16 mg Δ <sup>1</sup> -THC (ate cake) | 0.095%                         | 8 M          | 21-29                        | 3 Naïve; all ≤1x/week | >105                      | 10 min               | Med, High THC ↑ 16, 66%                   | ↑ 44%              | Not dosed together                   | (64) |
| RT               | Brake latency        | 0, 1.77, 3.95%; 10 puffs                       | --                             | 10           | 21-45                        | ≥Weekly, <daily       | Random test battery order | ≤3.5 km              | High THC ↑ 0.054 sec (p<0.10)             | --                 | --                                   | (57) |
| RT               | Brake latency        | 0, 1.75, 3.33%; 10 puffs                       | 0, 0.25, 0.5                   | 12           | 21-45                        | 2-21 of past 30 days  | 25 <sup>a</sup>           | 10 min               | ns                                        | ↑ ~0.06-0.07 sec   | No interaction: ↑ ns from EtOH alone | (65) |
| RT               | RT to secondary task | 0, 13, 17 mg                                   | 0, 0.5                         | 14           | 26.1 ± 1.3                   | 1-4x/ Month           | 30                        | 54.5 km <sup>c</sup> | Low THC ↑<br>High THC ↑ more than Low THC | ↑ Same as Low THC  | Not dosed together                   | (10) |
| RT               | Incursion avoidance  | 0, 22.9 mg                                     | --                             | 50 M<br>35 F | 18-31                        | 1-10x/ Month          | ~15 <sup>b</sup>          | ~15 min              | ns                                        | --                 | --                                   | (55) |
| RT               | Sign detection       | 0, 19, 38 mg                                   | 0, 0.4, 0.6                    | 47           | 18-21, 25-40                 | Not specified         | 5 <sup>b</sup>            | 6.6 km               | High THC ↑ 0.051 sec                      | ns                 | No interaction                       | (53) |

| Measure             | Measured by      | THC Dose     | Dose EtOH (g/kg or target BAC) | N            | Age (years) Mean±SD, [Range] | Cannabis History | Time (min) after THC dose | Drive Length/ Time          | Outcome: THC only                               | Outcome: EtOH only    | Outcome: Combination                                     | Ref. |
|---------------------|------------------|--------------|--------------------------------|--------------|------------------------------|------------------|---------------------------|-----------------------------|-------------------------------------------------|-----------------------|----------------------------------------------------------|------|
| Maintain Headway    | Mean Headway (m) | 0, 19, 38 mg | 0, 0.4, 0.6                    | 47           | 18-21, 25-40                 | Not specified    | 5 <sup>b</sup>            | 6.6 km                      | Low, High THC ↑ 8.76, 16.76                     | ns                    | No interaction                                           | (53) |
| Headway Variability | SD Headway (m)   | 0, 19, 38 mg | 0, 0.4, 0.6                    | 47           | 18-21, 25-40                 | Not specified    | 5 <sup>b</sup>            | 6.6 km                      | Low, High THC ↑ 4.29, 7.78                      | ns                    | No interaction                                           | (53) |
| Road Tracking       | SDLP             | 0, 13, 17 mg | 0, 0.5                         | 14           | 26.1 ± 1.3                   | 1-4x/ Month      | 30                        | 54.5 km <sup>c</sup>        | Low & High THC ↑                                | ns                    | Not dosed together                                       | (10) |
| Road Tracking       | SDLP             | 0, 22.9 mg   | --                             | 50 M<br>35 F | 18-31                        | 1-10x/ Month     | ~15 <sup>b</sup>          | ~15 min                     | ns                                              | --                    | --                                                       | (55) |
| Road Tracking       | SDLP (cm)        | 0, 19, 38 mg | 0, 0.4, 0.6                    | 47           | 18-21, 25-40                 | Not specified    | 5 <sup>b</sup>            | 6.6 km                      | Low, High THC ↑ 4, 7;<br>Low-High difference ns | Low, High EtOH ↑ 5, 5 | No interaction                                           | (53) |
| Road Tracking       | SDLP             | 0, 13 mg     | 0.05%                          | 12           | 24-29                        | 1-4x/ Month      | 30                        | 37.7 km, rural <sup>d</sup> | ns                                              | ns                    | THC+EtOH ↑ relative to placebo, THC only, & alcohol only | (3)  |

| Measure       | Measured by                                                  | THC Dose                           | Dose EtOH (g/kg or target BAC) | N            | Age (years) Mean±SD, [Range] | Cannabis History   | Time (min) after THC dose | Drive Length/ Time   | Outcome: THC only                                                | Outcome: EtOH only | Outcome: Combination | Ref. |
|---------------|--------------------------------------------------------------|------------------------------------|--------------------------------|--------------|------------------------------|--------------------|---------------------------|----------------------|------------------------------------------------------------------|--------------------|----------------------|------|
| Road Tracking | # Cones knocked over                                         | 0, 1.77, 3.95% 10                  | --                             | 10           | 21-45                        | ≥Weekly, <daily    | Random test battery order | Not given            | ns                                                               | --                 | --                   | (57) |
| Tracking      | % Time in lane                                               | 0, 16.5, 45.7 mg; 20 mg dronabinol | --                             | 8 M          | 22-30                        | Occasional smokers | 60-330 <sup>b</sup>       | Not given            | Low, High THC & dronabinol impaired                              | --                 | --                   | (60) |
| Road Tracking | “Straddled line” variables (lane division & center division) | 0, 14, 52 mg                       | --                             | 40           | 21-35                        | Not given          | 30, 80 <sup>b</sup>       | Not given            | Low, High THC impaired, only at 2 <sup>nd</sup> drive (t=80 min) | --                 | --                   | (66) |
| Speed         | Mean speed                                                   | 0, 1.77, 3.95%; 10 puffs           | --                             | 10           | 21-45                        | ≥Weekly, <daily    | Random test battery order | Not given            | ns                                                               | --                 | --                   | (57) |
| Speed         | Mean speed                                                   | 0, 13, 17 mg                       | 0, 0.5                         | 14           | 26.1 ± 1.3                   | 1-4x/ Month        | 30                        | 54.5 km <sup>c</sup> | Low & High THC ↓, dose-dependent                                 | ↑                  | Not dosed together   | (10) |
| Speed         | Mean speed                                                   | 0, 22.9 mg                         | --                             | 50 M<br>35 F | 18-31                        | 1-10x/ Month       | ~15 <sup>b</sup>          | ~15 min              | THC ↓ only during multi-tasking (PASAT)                          | --                 | --                   | (55) |

| Measure           | Measured by       | THC Dose                                       | Dose EtOH (g/kg or target BAC) | N            | Age (years) Mean±SD, [Range] | Cannabis History      | Time (min) after THC dose | Drive Length/ Time          | Outcome: THC only     | Outcome: EtOH only     | Outcome: Combination                                     | Ref. |
|-------------------|-------------------|------------------------------------------------|--------------------------------|--------------|------------------------------|-----------------------|---------------------------|-----------------------------|-----------------------|------------------------|----------------------------------------------------------|------|
| Speed             | Mean speed (km/h) | 0, 19, 38 mg                                   | 0, 0.4, 0.6                    | 47           | 18-21, 25-40                 | Not specified         | 5 <sup>b</sup>            | 6.6 km                      | High THC<br>↓<br>0.97 | Low EtOH ↑<br>0.72     | No interaction                                           | (53) |
| Speed             | Mean speed        | 0, 13 mg                                       | 0.05%                          | 12           | 24-29                        | 1-4x/ Month           | 30                        | 37.7 km, rural <sup>d</sup> | THC ↓                 | ↑ Relative to THC only | THC+ EtOH ↑, borderline-significant relative to THC only | (3)  |
| Speed variability | SD speed          | 0, 8, 12, 16 mg Δ <sup>1</sup> -THC (ate cake) | 0.095%                         | 8 M          | 21-29                        | 3 Naïve; all ≤1x/week | >105                      | 10 min                      | High THC<br>↑ ~110%   | ns                     | Not dosed together                                       | (64) |
| Speed variability | SD speed          | 0, 1.77, 3.95%; 10 puffs                       | --                             | 10           | 21-45                        | ≥Weekly, <daily       | Random test battery order | Not given                   | ns                    | --                     | --                                                       | (57) |
| Speed variability | SD speed          | 0, 13, 17 mg                                   | 0, 0.5                         | 14           | 26.1 ± 1.3                   | 1-4x/ Month           | 30                        | 54.5 km <sup>c</sup>        | High THC<br>↑         | ns                     | Not dosed together                                       | (10) |
| Speed variability | SD speed          | 0, 22.9 mg                                     | --                             | 50 M<br>35 F | 18-31                        | 1-10x/ Month          | ~15 C                     | ~15 min                     | ns                    | --                     | --                                                       | (55) |
| Speed variability | SD speed (km/h)   | 0, 19, 38 mg                                   | 0, 0.4, 0.6                    | 47           | 18-21, 25-40                 | Not specified         | 5 C                       | 6.6 km                      | High THC<br>↑<br>0.62 | Low EtOH ↑<br>0.44     | No interaction                                           | (53) |
| Speed variability | SD speed          | 0, 13 mg                                       | 0.05%                          | 12           | 24-29                        | 1-4x/ Month           | 30                        | 37.7 km, rural <sup>d</sup> | ns                    | ns                     | No interaction                                           | (3)  |

| Measure                                                   | Measured by                                           | THC Dose                           | Dose EtOH (g/kg or target BAC) | N            | Age (years) Mean±SD, [Range] | Cannabis History   | Time (min) after THC dose | Drive Length/ Time          | Outcome: THC only                                   | Outcome: EtOH only    | Outcome: Combination      | Ref. |
|-----------------------------------------------------------|-------------------------------------------------------|------------------------------------|--------------------------------|--------------|------------------------------|--------------------|---------------------------|-----------------------------|-----------------------------------------------------|-----------------------|---------------------------|------|
| Impaired Divided Attention                                | PASAT distracter task during uneventful drive segment | 0, 22.9 mg                         | --                             | 50 M<br>35 F | 18-31                        | 1-10x/ Month       | ~15 <sup>b</sup>          | 110 sec                     | Failure to show practice effects seen under placebo | --                    | --                        | (55) |
| Impaired Divided Attention                                | Car Following + Sign Detection Tasks                  | 0, 19, 38 mg                       | 0, 0.4, 0.6                    | 47           | 18-21, 25-40                 | Not specified      | 5 <sup>b</sup>            | 6.6 km                      | High THC<br>↑ mean headway & ↑ SD headway           | ns                    | No interaction            | (53) |
| Visual Search/ Visual Processing Speed/ Short-term Memory | Road sign pair detection                              | 0, 16.5, 45.7 mg; 20 mg dronabinol | --                             | 8 M          | 22-30                        | Occasional smokers | 60-330 <sup>b</sup>       | Not given                   | High THC impaired                                   | --                    | --                        | (60) |
| Collisions                                                | # Collisions                                          | 0, 13, 17 mg                       | 0, 0.5                         | 14           | 26.1 ± 1.3                   | 1-4x/ Month        | 30                        | 54.5 km <sup>c</sup>        | Placebo: 2<br>Low THC: 3<br>High THC: 6             | Placebo: 2<br>EtOH: 4 | Not dosed together        | (10) |
| Collisions                                                | # Collisions across study                             | 0, 13 mg                           | 0.05%                          | 12           | 24-29                        | 1-4x/ Month        | 30                        | 37.7 km, rural <sup>d</sup> | Placebo: 2<br>THC: 3                                | Placebo: 2<br>EtOH: 2 | Placebo: 2<br>THC+EtOH: 5 | (3)  |

| Measure          | Measured by                             | THC Dose                                    | Dose EtOH (g/kg or target BAC) | N  | Age (years) Mean±SD, [Range] | Cannabis History      | Time (min) after THC dose | Drive Length/Time    | Outcome: THC only                             | Outcome: EtOH only    | Outcome: Combination      | Ref.     |
|------------------|-----------------------------------------|---------------------------------------------|--------------------------------|----|------------------------------|-----------------------|---------------------------|----------------------|-----------------------------------------------|-----------------------|---------------------------|----------|
| Collisions       | # drivers involved in collisions        | 0, 13, 17 mg                                | 0, 0.5                         | 14 | 26.1 ± 1.3                   | 1-4x/ Month           | 30                        | 54.5 km <sup>c</sup> | Placebo: 2<br>Low<br>THC: 3<br>High<br>THC: 6 | Placebo: 2<br>EtOH: 3 | Not dosed together        | (10)     |
| <i>On-Road</i>   |                                         |                                             |                                |    |                              |                       |                           |                      |                                               |                       |                           |          |
| RT               | Mean RT to preceding vehicle's movement | 0, 100, 200, 300 µg/kg (0, ~7, ~14, ~21 mg) | --                             | 16 | 21-40                        | >1x/ Month; not daily | 45 <sup>a</sup>           | 96 km <sup>e</sup>   | ns                                            | --                    | --                        | (59)     |
| RT               | Mean RT to preceding vehicle's movement | 0, 100, 200 µg/kg (0, ~7, ~14 mg)           | 0, 0.04%                       | 18 | 21-40                        | >1x/ Month; not daily | 30, 75 <sup>a</sup>       | 80 km <sup>f</sup>   | ns                                            | ns                    | High<br>THC+EtOH ↑<br>36% | (59, 67) |
| Maintain Headway | Mean Headway (m)                        | 0, 100, 200, 300 µg/kg (0, ~7, ~14, ~21 mg) | --                             | 16 | 21-40                        | >1x/ Month; not daily | 45 <sup>a</sup>           | 96 km <sup>e</sup>   | Low, Med, High<br>THC ↑ 8, 6, 2               | --                    | --                        | (59)     |
| Maintain Headway | Mean Headway (m)                        | 0, 100, 200 µg/kg (0, ~7, ~14 mg)           | 0, 0.04%                       | 18 | 21-40                        | >1x/ Month; not daily | 30, 75 <sup>a</sup>       | 80 km <sup>f</sup>   | ns                                            | ns                    | No interaction            | (59, 67) |

| Measure             | Measured by      | THC Dose                                    | Dose EtOH (g/kg or target BAC) | N  | Age (years) Mean±SD, [Range] | Cannabis History      | Time (min) after THC dose | Drive Length/ Time | Outcome: THC only                         | Outcome: EtOH only | Outcome: Combination                    | Ref.     |
|---------------------|------------------|---------------------------------------------|--------------------------------|----|------------------------------|-----------------------|---------------------------|--------------------|-------------------------------------------|--------------------|-----------------------------------------|----------|
| Headway Variability | SD Headway (m)   | 0, 100, 200 µg/kg (0, ~7, ~14 mg)           | 0, 0.04%                       | 18 | 21-40                        | >1x/ Month; not daily | 30, 75 <sup>a</sup>       | 80 km <sup>f</sup> | Low, High THC ↑ 2.9, 3.8                  | ↑ 0.9              | Low, High THC+EtOH ↑ 2.5, 3             | (59, 67) |
| Road Tracking       | SDLP             | 0, 100, 200, 300 µg/kg (0, ~7, ~14, ~21 mg) | --                             | 24 | 21-40                        | >1x/ Month; not daily | 40, 100 <sup>a</sup>      | 22 km              | Low, Med, High THC ↑, both drives         | --                 | --                                      | (59)     |
| Road Tracking       | SDLP (cm)        | 0, 100, 200, 300 µg/kg (0, ~7, ~14, ~21 mg) | --                             | 16 | 21-40                        | >1x/ Month; not daily | 45 <sup>a</sup>           | 96 km <sup>e</sup> | Med, High THC ↑ 1.7, 2.9                  | --                 | --                                      | (59)     |
| Road Tracking       | SDLP (cm)        | 0, 100, 200 µg/kg (0, ~7, ~14 mg)           | 0, 0.04%                       | 18 | 21-40                        | >1x/ Month; not daily | 30, 75 <sup>a</sup>       | 80 km <sup>f</sup> | Low, High THC ↑ 2.7 (minor), 3.5 moderate | ↑ 2.2 (minor)      | Low, High THC+EtOH ↑ 5.3, 8.5 (severe)  | (59, 67) |
| Road Tracking       | Time Out of Lane | 0, 100, 200 µg/kg (0, ~7, ~14 mg)           | 0, 0.04%                       | 18 | 21-40                        | >1x/ Month; not daily | 30, 75 <sup>a</sup>       | 80 km <sup>f</sup> | ns                                        | ns                 | Low, High THC+EtOH ↑ to >0.6%, to ~1.1% | (59, 67) |

| Measure                   | Measured by                          | THC Dose                                    | Dose EtOH (g/kg or target BAC) | N  | Age (years) Mean±SD, [Range] | Cannabis History      | Time (min) after THC dose        | Drive Length/ Time | Outcome: THC only | Outcome: EtOH only | Outcome: Combination | Ref. |
|---------------------------|--------------------------------------|---------------------------------------------|--------------------------------|----|------------------------------|-----------------------|----------------------------------|--------------------|-------------------|--------------------|----------------------|------|
| Speed                     | Mean speed                           | 0, 100, 200, 300 µg/kg (0, ~7, ~14, ~21 mg) | --                             | 24 | 21-40                        | >1x/ Month; not daily | 40, 100 <sup>a</sup>             | 22 km              | ns                | --                 | --                   | (59) |
| Speed                     | Mean speed                           | 0, 100, 200, 300 µg/kg (0, ~7, ~14, ~21 mg) | --                             | 16 | 21-40                        | >1x/ Month; not daily | 45 <sup>a</sup>                  | 96 km <sup>c</sup> | ns                | --                 | --                   | (59) |
| Speed variability         | SD speed                             | 0, 100, 200, 300 µg/kg (0, ~7, ~14, ~21 mg) | --                             | 24 | 21-40                        | >1x/ Month; not daily | 40, 100 <sup>a</sup>             | 22 km              | ns                | --                 | --                   | (59) |
| Speed variability         | SD speed                             | 0, 100, 200, 300 µg/kg (0, ~7, ~14, ~21 mg) | --                             | 16 | 21-40                        | >1x/ Month; not daily | 45 <sup>a</sup>                  | 96 km <sup>c</sup> | ns                | --                 | --                   | (59) |
| Visual Search/ Processing | Search for traffic at inter-sections | 0, 100 µg/kg (0, ~7 mg)                     | 0, 0.05% (reached 0.04%)       | 16 | 21-40                        | >1x/ Month; not daily | 25 <sup>a</sup> /15 <sup>c</sup> | 40-45 min          | ns                | ns                 | ↓ 3%                 | (4)  |

<sup>a</sup>Denotes times after smoking initiated

<sup>b</sup>Denotes times after smoking completed



<sup>c</sup>Mostly-straight road, maintain 55 mph: 17.2 km; downhill winding road, limit 45 mph: 12.7 km; follow behind a lead car: 11.6 km; 4 unexpected events, limit 55 mph: 13.0 km

<sup>d</sup>Monotonic road with 5 unexpected events: 14.8 km; sharp curves, limit 45 mph, foggy with unexpected events: 12.1 km; downhill, limit 45 mph, moderate & sharp curves, 2 unexpected events: 10.8 km

<sup>e</sup>Car following: 16 km; road tracking: 64 km; 2<sup>nd</sup> car following, 16 km

<sup>f</sup>Car following: 40 km (~25 min); road tracking: 40 km (~25 min)

Abbreviations: THC:  $\Delta^9$ -tetrahydrocannabinol; BAC: blood alcohol content (%); SD: standard deviation; RT: reaction time; ns: not significant; SDLP: standard deviation of lateral position; PASAT: Paced Auditory Serial Additions Test
