# Supplementary material
Source: PubMed Central journal article supplement (PMC3836260)
Supplement: NIHMS488287-supplement-table_5.pdf [file NIHMS488287-supplement-table_5.pdf]

Supplemental Table 5. Effect of smoked cannabis and alcohol (EtOH) on neurocognitive function: laboratory studies

| Task                | THC Dose                                               | EtOH (g/kg or target BAC) | N  | Age (years) Mean±SD, [Range] | Cannabis History                          | Measure                            | Time (h) After THC     | Outcome: THC only | Outcome: EtOH only            | Outcome: Combination         | Relative to                 | Ref. |
|---------------------|--------------------------------------------------------|---------------------------|----|------------------------------|-------------------------------------------|------------------------------------|------------------------|-------------------|-------------------------------|------------------------------|-----------------------------|------|
| Free recall         | Two 0% or 3.6% THC joints; 4 puffs/joint spaced by 2 h | 0 or 0.6 [M]/0.5 [F]      | 14 | 24.5, [21-34]                | ≥1x/Month; 10/14: >100 lifetime occasions | # Words recalled                   | ~1.25-1.5 <sup>b</sup> | No effect         | -2.7 (6.6 vs. 9.3)            | No interaction               | Before dosing               | (56) |
| Time Estimation     | Two 0% or 3.6% THC joints; 4 puffs/joint spaced by 2 h | 0 or 0.6 [M]/0.5 [F]      | 14 | 24.5, [21-34]                | ≥1x/Month; 10/14: >100 lifetime occasions | Respond at estimated time targets  | ~1.25 <sup>b</sup>     | Under-estimation  | Over-estimation               | Interaction: canceled effect | Placebo                     | (56) |
| SST                 | 400 µg/kg (~28 mg)                                     | 0%, 0.05%, 0.07%          | 21 | 23.2±8.4, [19-38]            | ≥4 Days/week                              | Stop RT                            | 1-3                    | No effect         | Increased                     | No interaction               | Before THC; placebo alcohol | (63) |
| Standing Steadiness | Two 0% or 3.6% THC joints; 4 puffs/joint spaced by 2 h | 0 or 0.6 [M]/0.5 [F]      | 14 | 24.5, [21-34]                | ≥1x/Month; 10/14: >100 lifetime occasions | Time (sec) before foot down in OLS | ~1.25-1.5 <sup>b</sup> | No effect         | -11.8 sec (45.9 vs. 57.7 sec) | No interaction               | Before dosing               | (56) |
| Equilibrium         | 0, 1.75% (~16 mg)THC, 3.3% THC (~30 mg)                | 0, 0.25, 0.5              | 12 | 24±3 [21-45]                 | 2-21 Days in past month                   | Sway/ Composite Equilibrium        | ~0.25 <sup>a</sup>     | Decreased         | No effect                     | No interaction               | THC alone                   | (65) |
| DSST                | Two 0% or 3.6% THC joints; 4 puffs/joint spaced by 2 h | 0 or 0.6 [M]/0.5 [F]      | 14 | 24.5, [21-34]                | ≥1x/Month; 10/14: >100 lifetime occasions | # Attempted                        | ~1.25-1.5 <sup>b</sup> | No effect         | Decreased                     | No interaction               | Before dosing               | (56) |

| Task              | THC Dose                                               | EtOH (g/kg or target BAC) | N  | Age (years) Mean±SD, [Range] | Cannabis History                          | Measure               | Time (h) After THC     | Outcome: THC only       | Outcome: EtOH only      | Outcome: Combination | Relative to                 | Ref. |
|-------------------|--------------------------------------------------------|---------------------------|----|------------------------------|-------------------------------------------|-----------------------|------------------------|-------------------------|-------------------------|----------------------|-----------------------------|------|
| DSST              | Two 0% or 3.6% THC joints; 4 puffs/joint spaced by 2 h | 0 or 0.6 [M]/0.5 [F]      | 14 | 24.5, [21-34]                | ≥1x/Month; 10/14: >100 lifetime occasions | # Correct             | ~1.25-1.5 <sup>b</sup> | No effect               | -6.5 (37.4 vs. 43.9)    | No interaction       | Before dosing               | (56) |
| DSST              | Two 0% or 3.6% THC joints; 4 puffs/joint spaced by 2 h | 0 or 0.6 [M]/0.5 [F]      | 14 | 24.5, [21-34]                | ≥1x/Month; 10/14: >100 lifetime occasions | % Correct             | ~1.25-1.5 <sup>b</sup> | -4.8% (91.3% vs. 96.1%) | -5.4% (91.1% vs. 96.5%) | No interaction       | Before dosing               | (56) |
| Logical Reasoning | Two 0% or 3.6% THC joints; 4 puffs/joint spaced by 2 h | 0 or 0.6 [M]/0.5 [F]      | 14 | 24.5, [21-34]                | ≥1x/Month; 10/14: >100 lifetime occasions | True/False statements | ~1.25-1.5 <sup>b</sup> | No effect               | No effect               | No interaction       | Before dosing               | (56) |
| Tower of London   | 400 µg/kg (~28 mg)                                     | 0%, 0.05%, 0.07%          | 21 | 23.2±8.4, [19-38]            | ≥4 Days/week                              | # Correct decisions   | 1.17-3.17              | No effect               | No effect               | No interaction       | Before THC; placebo alcohol | (63) |
| Tower of London   | 400 µg/kg (~28 mg)                                     | 0%, 0.05%, 0.07%          | 21 | 23.2±8.4, [19-38]            | ≥4 Days/week                              | RT                    | 1.17-3.17              | No effect               | No effect               | No interaction       | Before THC; placebo alcohol | (63) |
| CTT               | 400 µg/kg (~28 mg)                                     | 0%, 0.05%, 0.07%          | 21 | 23.2±8.4, [19-38]            | ≥4 Days/week                              | λ <sub>c</sub>        | 0.3-3.3                | No effect               | Decreased               | No interaction       | Before THC; placebo alcohol | (63) |

| Task | THC Dose                                               | EtOH (g/kg or target BAC) | N  | Age (years) Mean±SD, [Range] | Cannabis History                          | Measure                                    | Time (h) After THC     | Outcome: THC only  | Outcome: EtOH only | Outcome: Combination | Relative to   | Ref. |
|------|--------------------------------------------------------|---------------------------|----|------------------------------|-------------------------------------------|--------------------------------------------|------------------------|--------------------|--------------------|----------------------|---------------|------|
| DAT  | Two 0% or 3.6% THC joints; 4 puffs/joint spaced by 2 h | 0 or 0.6 [M]/0.5 [F]      | 14 | 24.5, [21-34]                | ≥1x/Month; 10/14: >100 lifetime occasions | Response to primary target: hit rate       | ~1.25-1.5 <sup>b</sup> | No effect          | No effect          | No interaction       | Before THC    | (56) |
| DAT  | Two 0% or 3.6% THC joints; 4 puffs/joint spaced by 2 h | 0 or 0.6 [M]/0.5 [F]      | 14 | 24.5, [21-34]                | ≥1x/Month; 10/14: >100 lifetime occasions | Response to primary target: RT             | ~1.25-1.5 <sup>b</sup> | No effect          | No effect          | No interaction       | Before THC    | (56) |
| DAT  | Two 0% or 3.6% THC joints; 4 puffs/joint spaced by 2 h | 0 or 0.6 [M]/0.5 [F]      | 14 | 24.5, [21-34]                | ≥1x/Month; 10/14: >100 lifetime occasions | # False alarm responses                    | ~1.25-1.5 <sup>b</sup> | +0.7 (1.6 vs. 0.9) | No effect          | No interaction       | Before dosing | (56) |
| DAT  | Two 0% or 3.6% THC joints; 4 puffs/joint spaced by 2 h | 0 or 0.6 [M]/0.5 [F]      | 14 | 24.5, [21-34]                | ≥1x/Month; 10/14: >100 lifetime occasions | # Errors estimating # of secondary targets | ~1.25-1.5 <sup>b</sup> | No effect          | +0.6 (1.6 vs. 1.0) | No interaction       | Before dosing | (56) |
| DAT  | 0, 13 mg                                               | 0, 0.05%                  | 12 | 26.1 [24-29]                 | 1-4x/Month                                | # Exercises completed                      | 0.25                   | No effect          | Decreased          | Decreased            | Placebo       | (3)  |
| DAT  | 0, 13 mg                                               | 0, 0.05%                  | 12 | 26.1 [24-29]                 | 1-4x/Month                                | % Success in arithmetic task               | 0.25                   | Decreased          | No effect          | No interaction       | Placebo       | (3)  |
| DAT  | 0, 13 mg                                               | 0, 0.05%                  | 12 | 26.1 [24-29]                 | 1-4x/Month                                | # Exercises with no response               | 0.25                   | Increased          | Increased          | Increased            | Placebo       | (3)  |

| Task | THC Dose | EtOH (g/kg or target BAC) | N  | Age (years) Mean±SD, [Range] | Cannabis History | Measure                      | Time (h) After THC | Outcome: THC only                        | Outcome: EtOH only | Outcome: Combination                                                                        | Relative to | Ref. |
|------|----------|---------------------------|----|------------------------------|------------------|------------------------------|--------------------|------------------------------------------|--------------------|---------------------------------------------------------------------------------------------|-------------|------|
| DAT  | 0, 13 mg | 0, 0.05%                  | 12 | 26.1 [24-29]                 | 1-4x/Month       | RT to secondary task         | 0.25               | Slightly increased                       | Slightly increased | No interaction                                                                              | Placebo     | (3)  |
| DAT  | 0, 13 mg | 0, 0.05%                  | 12 | 26.1 [24-29]                 | 1-4x/Month       | False alarm responses        | 0.25               | Slightly increased                       | Slightly increased | Increased; Interaction: greatest effect after combination                                   | Placebo     | (3)  |
| DAT  | 0, 13 mg | 0, 0.05%                  | 12 | 26.1 [24-29]                 | 1-4x/Month       | # Exercises completed        | 1.25               | No effect                                | No effect          | Decreased; Interaction: alcohol effects persisted to second trial when combined w/ THC      | Placebo     | (3)  |
| DAT  | 0, 13 mg | 0, 0.05%                  | 12 | 26.1 [24-29]                 | 1-4x/Month       | % Success in arithmetic task | 1.25               | Decreased; smaller effect than 1st trial | No effect          | No interaction                                                                              | Placebo     | (3)  |
| DAT  | 0, 13 mg | 0, 0.05%                  | 12 | 26.1 [24-29]                 | 1-4x/Month       | # Exercises with no response | 1.25               | No effect                                | No effect          | Increased; Interaction: effects persisted to second trial w/combination, time effect p=0.06 | Placebo     | (3)  |
| DAT  | 0, 13 mg | 0, 0.05%                  | 12 | 26.1 [24-29]                 | 1-4x/Month       | RT to secondary task         | 1.25               | No effect                                | No effect          | Slightly increased                                                                          | Placebo     | (3)  |

| Task | THC Dose           | EtOH (g/kg or target BAC) | N  | Age (years) Mean±SD, [Range] | Cannabis History | Measure                                | Time (h) After THC | Outcome: THC only  | Outcome: EtOH only | Outcome: Combination                                                                 | Relative to                 | Ref. |
|------|--------------------|---------------------------|----|------------------------------|------------------|----------------------------------------|--------------------|--------------------|--------------------|--------------------------------------------------------------------------------------|-----------------------------|------|
| DAT  | 0, 13 mg           | 0, 0.05%                  | 12 | 26.1 [24-29]                 | 1-4x/ month      | False alarm responses                  | 1.25               | Slightly increased | No effect          | Increased; Interaction: greatest effect after combination; persisted to second trial | Placebo                     | (3)  |
| DAT  | 400 µg/kg (~28 mg) | 0%, 0.05%, 0.07%          | 21 | 23.2±8.4, [19-38]            | ≥4 Days/week     | # Control losses                       | 0.5-2.5            | Increased          | Increased          | Increased; Interaction: [statistical] combination produced greatest impairment       | Before THC; placebo alcohol | (63) |
| DAT  | 400 µg/kg (~28 mg) | 0%, 0.05%, 0.07%          | 21 | 23.2±8.4, [19-38]            | ≥4 Days/week     | # Correct detections on secondary task | 0.5-2.5            | Decreased          | Decreased          | No interaction                                                                       | Before THC; placebo alcohol | (63) |
| DAT  | 400 µg/kg (~28 mg) | 0%, 0.05%, 0.07%          | 21 | 23.2±8.4, [19-38]            | ≥4 Days/week     | RT                                     | 0.5-2.5            | Increased          | Increased          | No interaction                                                                       | Before THC; placebo alcohol | (63) |
| DAT  | 400 µg/kg (~28 mg) | 0%, 0.05%, 0.07%          | 21 | 23.2±8.4, [19-38]            | ≥4 Days/week     | Tracking error                         | 0.5-2.5            | No effect          | Increased          | No interaction                                                                       | Before THC; placebo alcohol | (63) |

<sup>a</sup>Denotes time after smoking initiated

<sup>b</sup>Denotes time after smoking completed

Abbreviations: THC:  $\Delta^9$ -tetrahydrocannabinol; EtOH: ethanol (alcohol); BAC: blood alcohol content; SD: standard deviation; SST: stop signal task; RT: reaction time; DSST: digit symbol substitution test; CTT: critical tracking task; DAT: divided attention task
